# Supplementary material for: Intrinsic Differences in Spatiotemporal Organization and Stromal Cell Interactions Between Isogenic Lung Cancer Cells of Epithelial and Mesenchymal Phenotypes Revealed by High-Dimensional Single-Cell Analysis of Heterotypic 3D Spheroid Models
Source: PubMed Central journal article supplement (PMC9076321; doi:10.3389/fonc.2022.818437), 2022-04-22
Supplement: DataSheet_1.pdf [file DataSheet_1.pdf]

## Supplementary Material

### **Intrinsic differences in spatiotemporal organization and stromal cell interactions between isogenic lung cancer cells of epithelial and mesenchymal phenotypes revealed by high-dimensional single-cell analysis of heterotypic 3D spheroid models**

Maria L. Lotsberg<sup>1,2,3</sup>, Gro V. Røsland<sup>1,2</sup>, Austin J. Rayford<sup>1,2,4</sup>, Sissel E. Dyrstad<sup>2</sup>, Camilla T. Ekanger<sup>2</sup>, Ning Lu<sup>1,2</sup>, Kirstine Frantz<sup>5</sup>, Linda E. B. Stuhr<sup>2</sup>, Henrik J. Ditzel<sup>5,6</sup>, Jean Paul Thiery<sup>1,7,8</sup>, Lars A. Akslen<sup>1,3,9</sup>, James B. Lorens<sup>1,2</sup> and Agnete S. T. Engelsen<sup>1,2\*</sup>

<sup>1</sup> Centre for Cancer Biomarkers (CCBIO), Department of Clinical Medicine, Faculty of Medicine, University of Bergen, Bergen, Norway

<sup>2</sup> Department of Biomedicine, Faculty of Medicine, University of Bergen, Bergen, Norway

<sup>3</sup> Department of Pathology, Haukeland University Hospital, Bergen, Norway

<sup>4</sup> BerGenBio, Bergen, Norway

<sup>5</sup> Institute of Molecular Medicine, University of Southern Denmark, Odense, Denmark

<sup>6</sup> Department of Oncology, Odense University Hospital, Odense, Denmark

<sup>7</sup> Guangzhou Laboratory, Guangzhou, China

<sup>8</sup> Gustave Roussy Cancer Campus, UMR 1186, Inserm, Université Paris-Saclay, Villejuif, France

<sup>9</sup> Department of Clinical Medicine, Section for Pathology, Faculty of Medicine, University of Bergen, Bergen, Norway

\* Correspondence: Dr. Agnete S. T. Engelsen E-mail: [agnete.engelsen@uib.no](mailto:agnete.engelsen@uib.no)

## 1 Supplementary Figures

## Figure S1

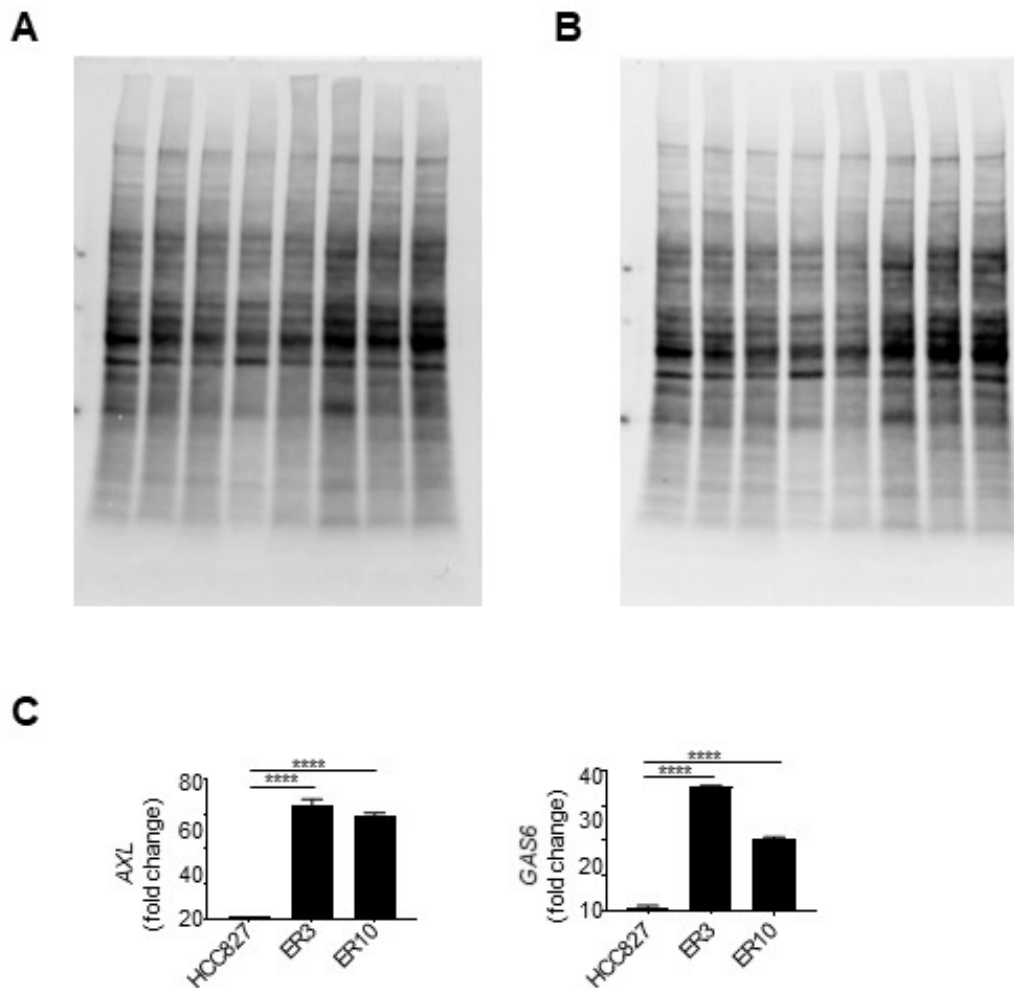**Figure S1: Total protein images for Western Blot quantification**

Total protein images used for quantification of Western Blot in Figure 1C, quantified in Figure 1D and 1F. Total protein for CDH1 (E-cadherin) and VIM (vimentin) blot is shown in (A) and CDH2 (N-cadherin) (B). (C) Expression of transcripts encoding *AXL*, and *GAS6*, assessed by RT-qPCR on cDNA prepared from HCC827 parental, ER3, and ER10 cells. RT-qPCR analyses were repeated  $n = 3$  times, and representative results from one experiment with  $n = 3$  technical replicates are presented in the figure as mean fold change  $\pm$  SD calculated by the  $2^{-\Delta\Delta C_t}$  method. Two-way ANOVA followed by Tukey's multiple comparison test comparing ER3 and ER10 against the parental cell line was used to calculate statistical significance.

**Figure S2**

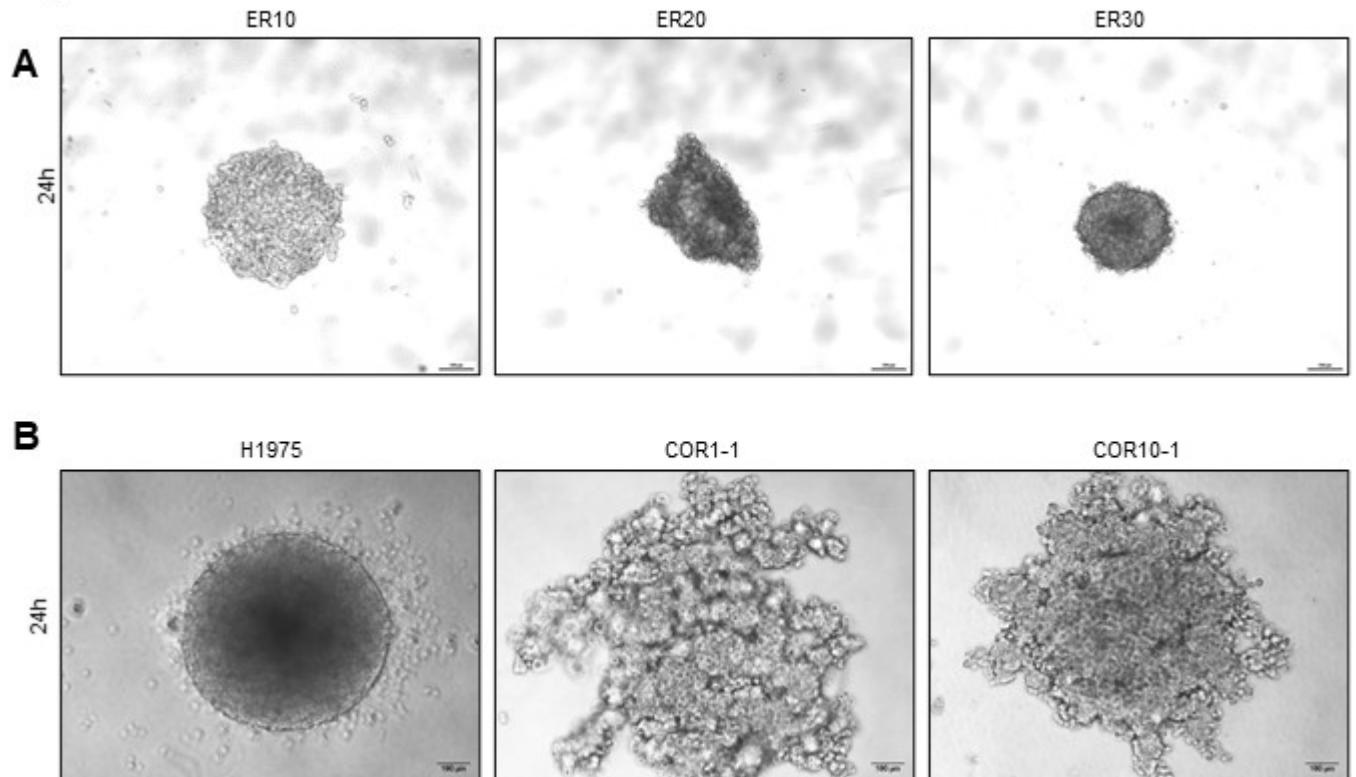

**Figure S2: Spheroid formation in HCC827, COR1-1, COR10-1, ER10, ER20, and ER30.**

**(A)** Nikon TE2000 images of ER10, ER20, and ER30 monoculture spheroids. Images were taken after 24 h using 4x objective. **(B)** Nikon TE2000 images of H1975, COR1-1, and COR10-1 monoculture spheroids. Images were taken after 24 h. 10x objective.

**Figure S3**

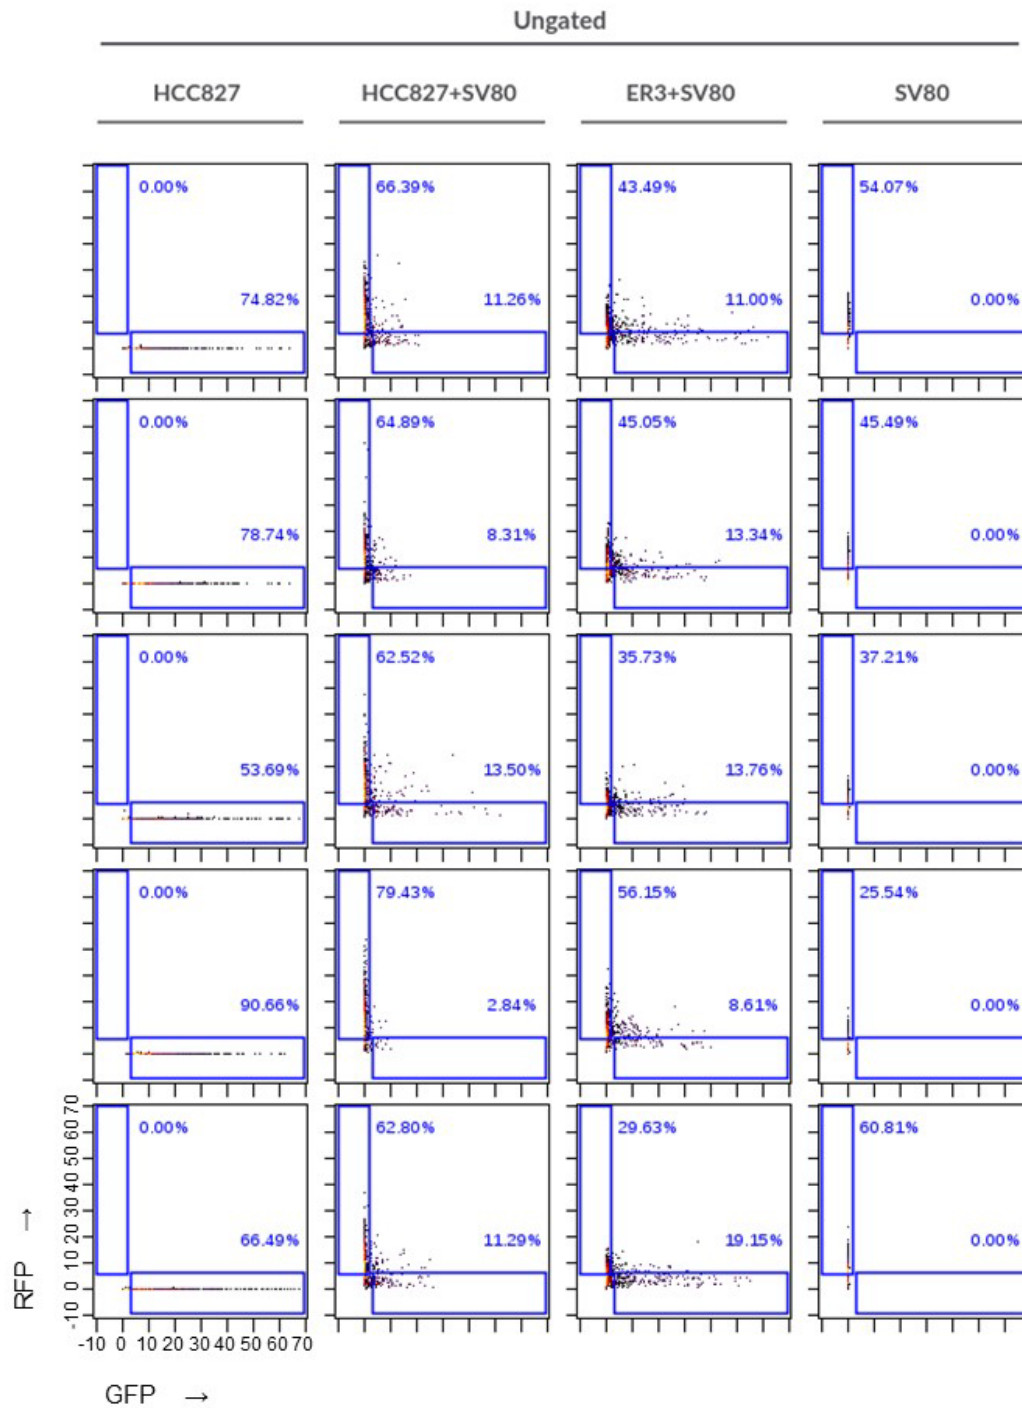

**Figure S3: GFP+ and RFP+ gating strategy for untreated spheroids**

Gating of GFP+ and RFP+ single-positive populations from the single-cell IMC data of untreated samples before visualizing channel intensities in the heatmap in Figure 7 Figure S4.

Figure S4

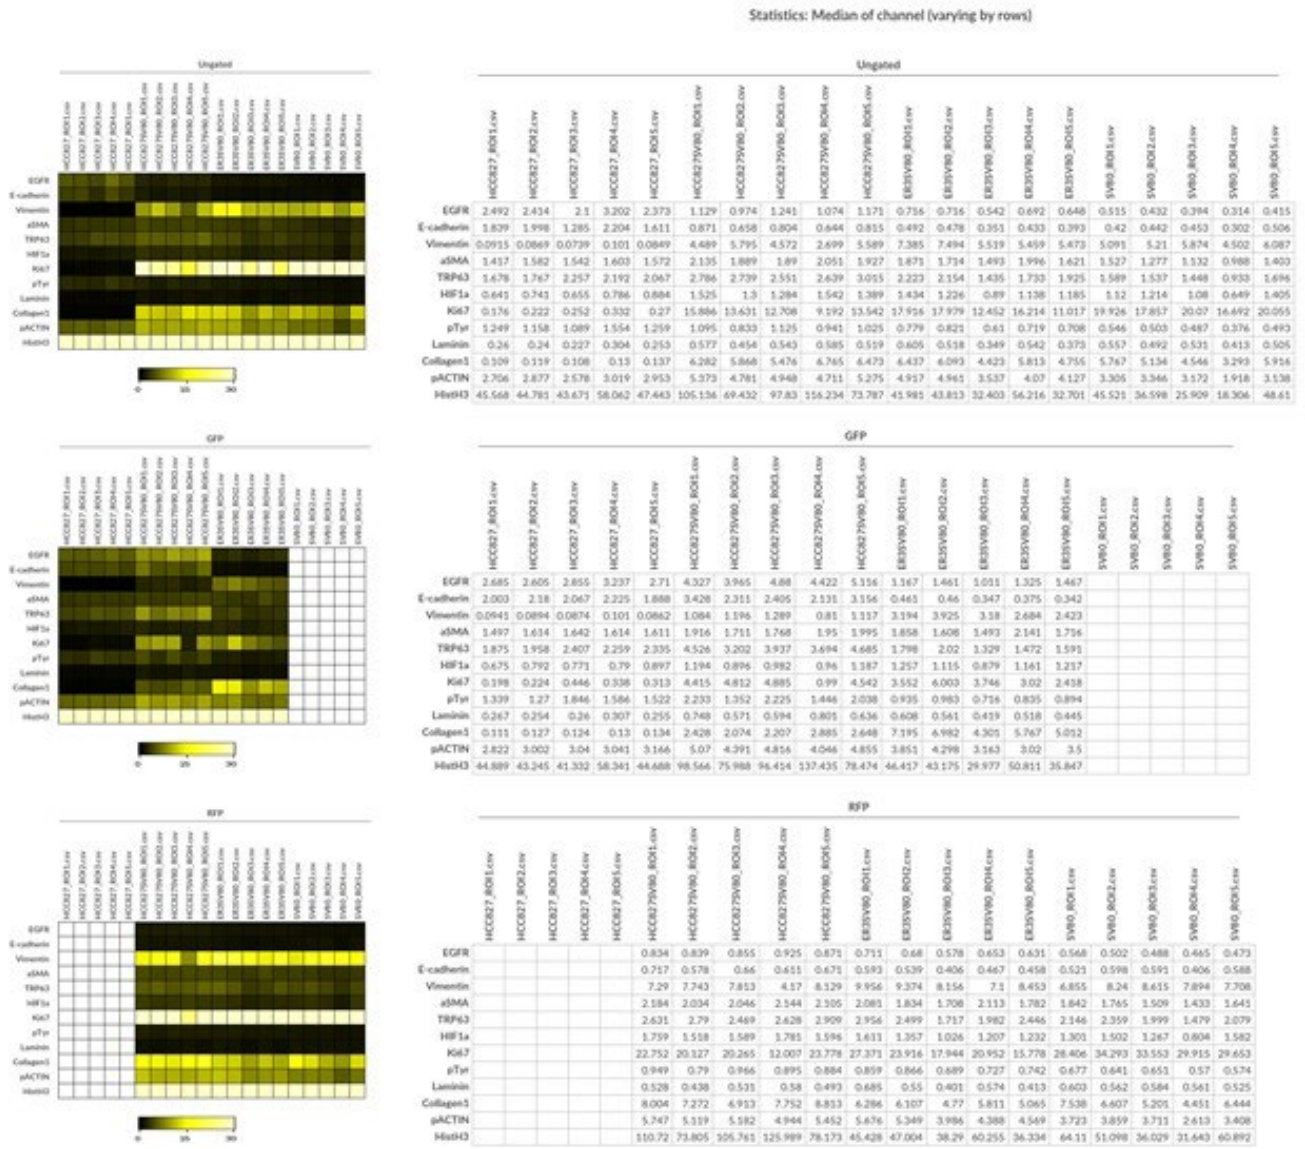

Figure S4: Heatmaps of channel expression in untreated spheroids

Median fluorescence intensity values and heatmap visualization for the untreated, GFP+ and RFP+ populations of the untreated samples.

**Figure S5**

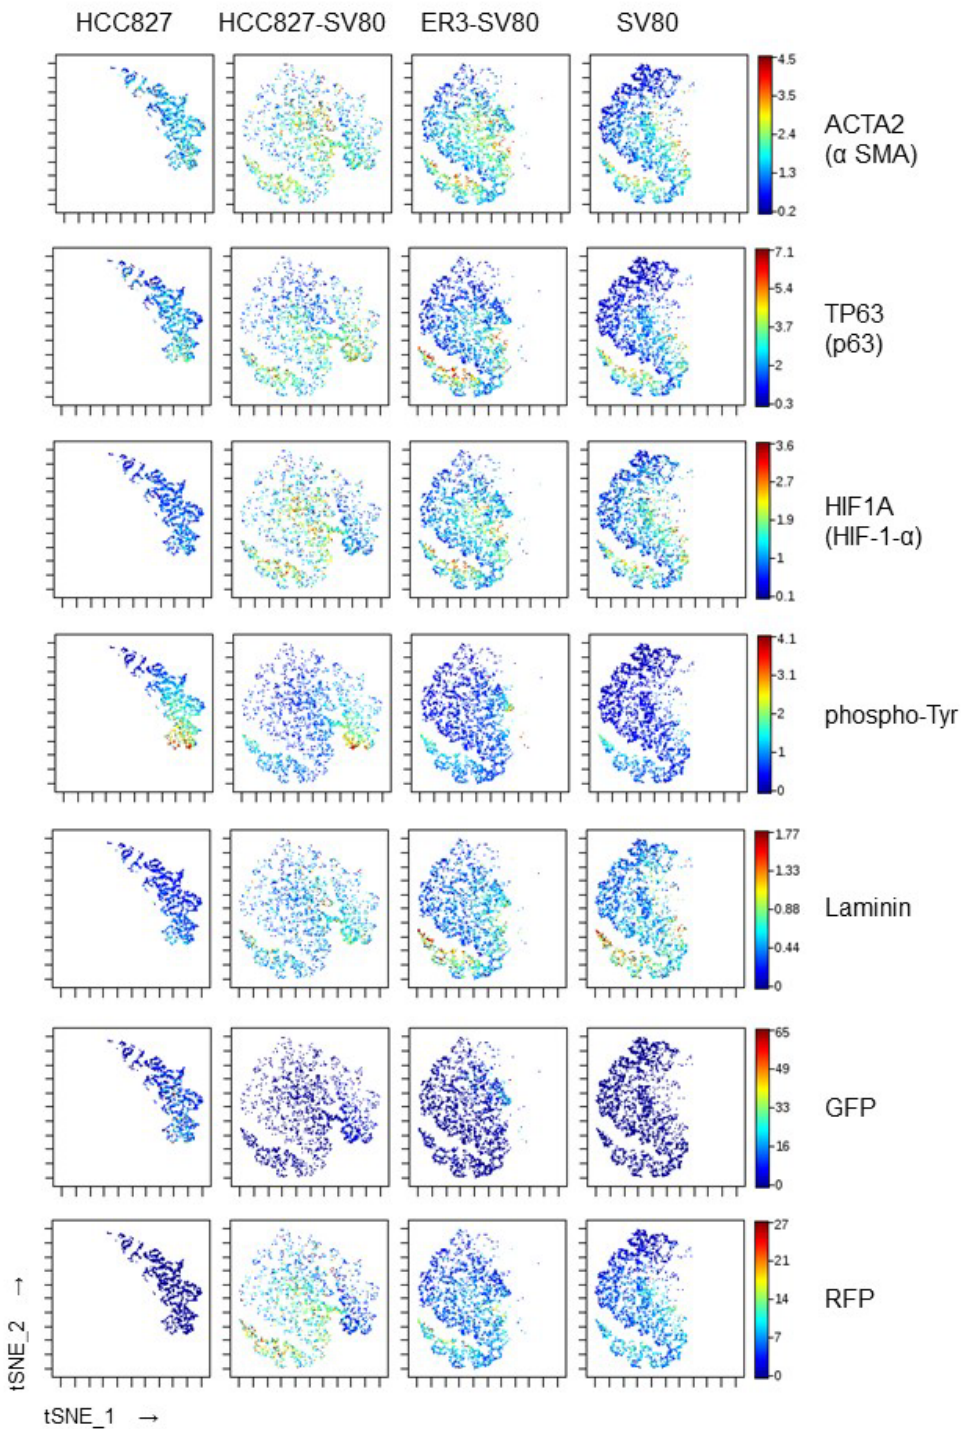

**Figure S5: viSNE marker expression in untreated spheroids**

Marker expression of ACTA2 ( $\alpha$ SMA), TP63 (p63), HIF1A (HIF1 $\alpha$ ), phosphor-Tyr, Laminin, GFP, and RFP displayed on the viSNE plots from untreated samples.

**Figure S6**

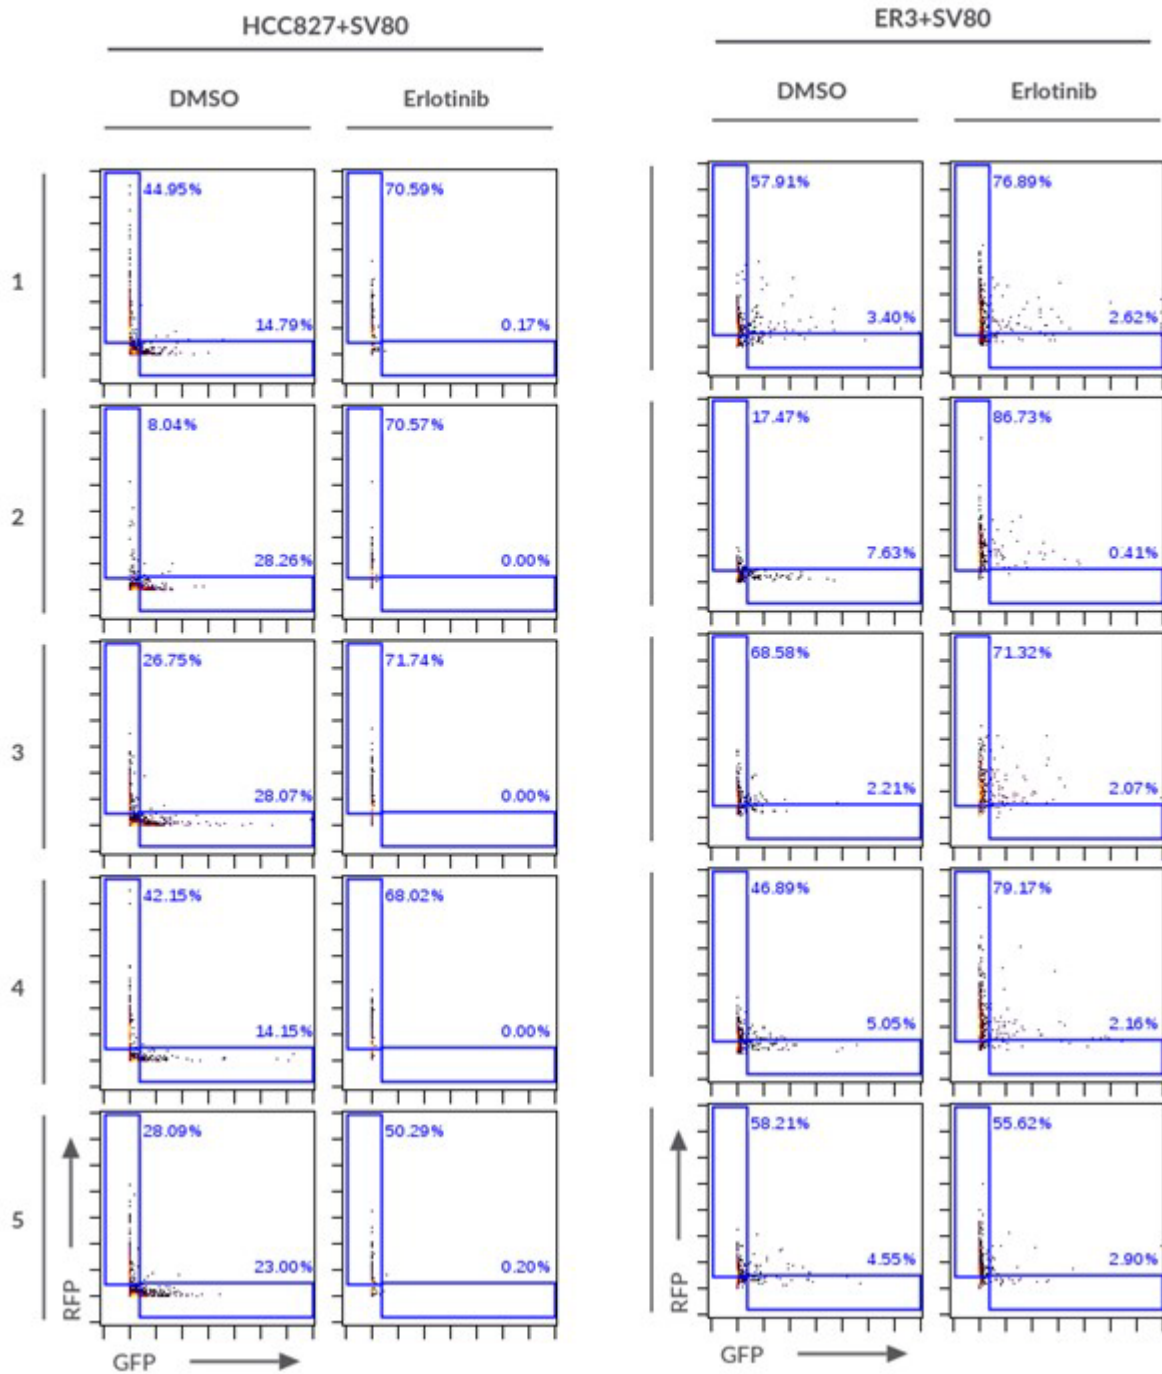

**Figure S6: GFP+ and RFP+ gating strategy for treated spheroids**

Gating of GFP+ and RFP+ single-positive populations from the single-cell IMC data from the DMSO and vehicle treated samples.

**Figure S7**

**A**

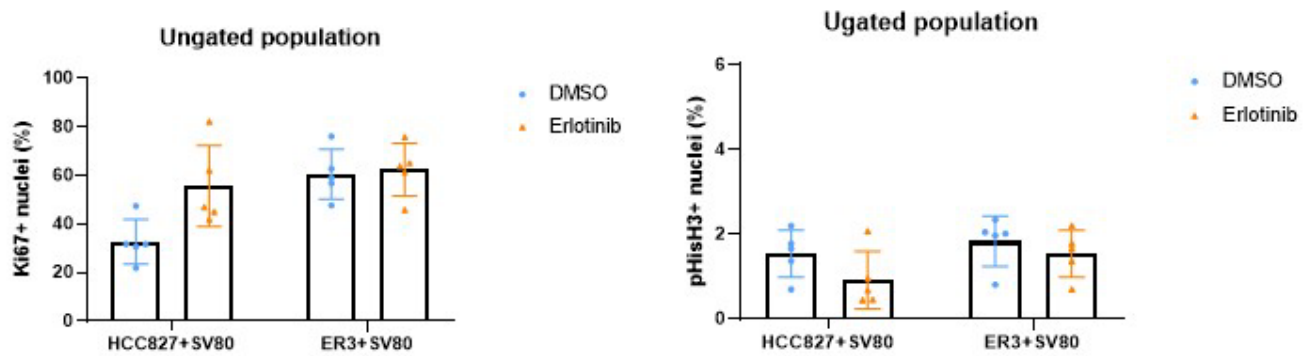

**B**

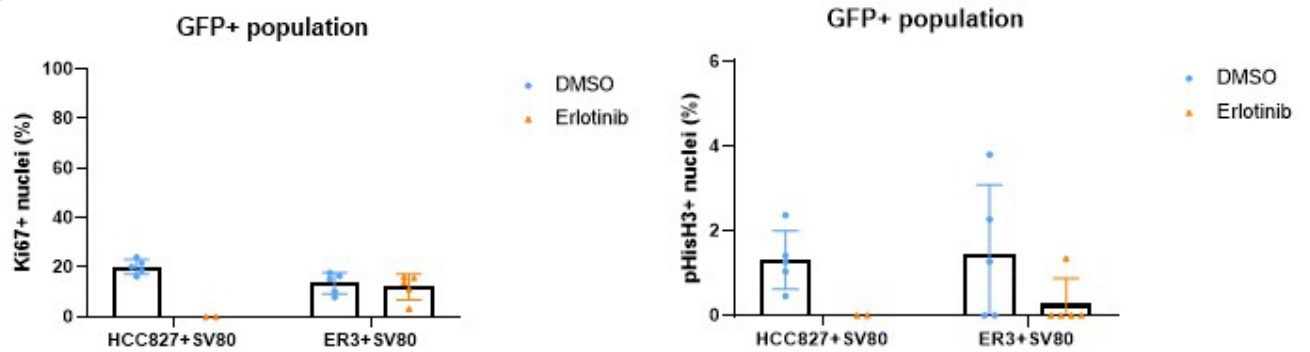

**C**

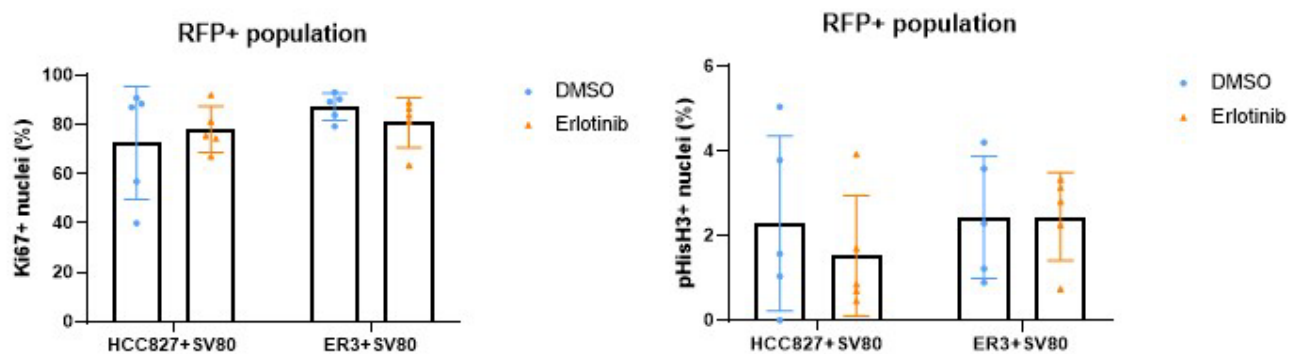

**Figure S7: Percentage of Ki67 (MKI67) and phospho Histone H3 positive nuclei in vehicle (DMSO) and EGFRi (erlotinib) treated spheroids**

Percentage of MKI67 (Ki67) positive (left) and phosphor-Histone H3 (pHisH3) positive (right) nuclei in the ungated (A), GFP+ (B) and RFP+ (C) populations of vehicle (DMSO) and EGFRi (erlotinib) treated spheroids. No statistical significance was found by the Mann-Whitney U-test using cytoBank to calculate the statistics.



**Figure S8**

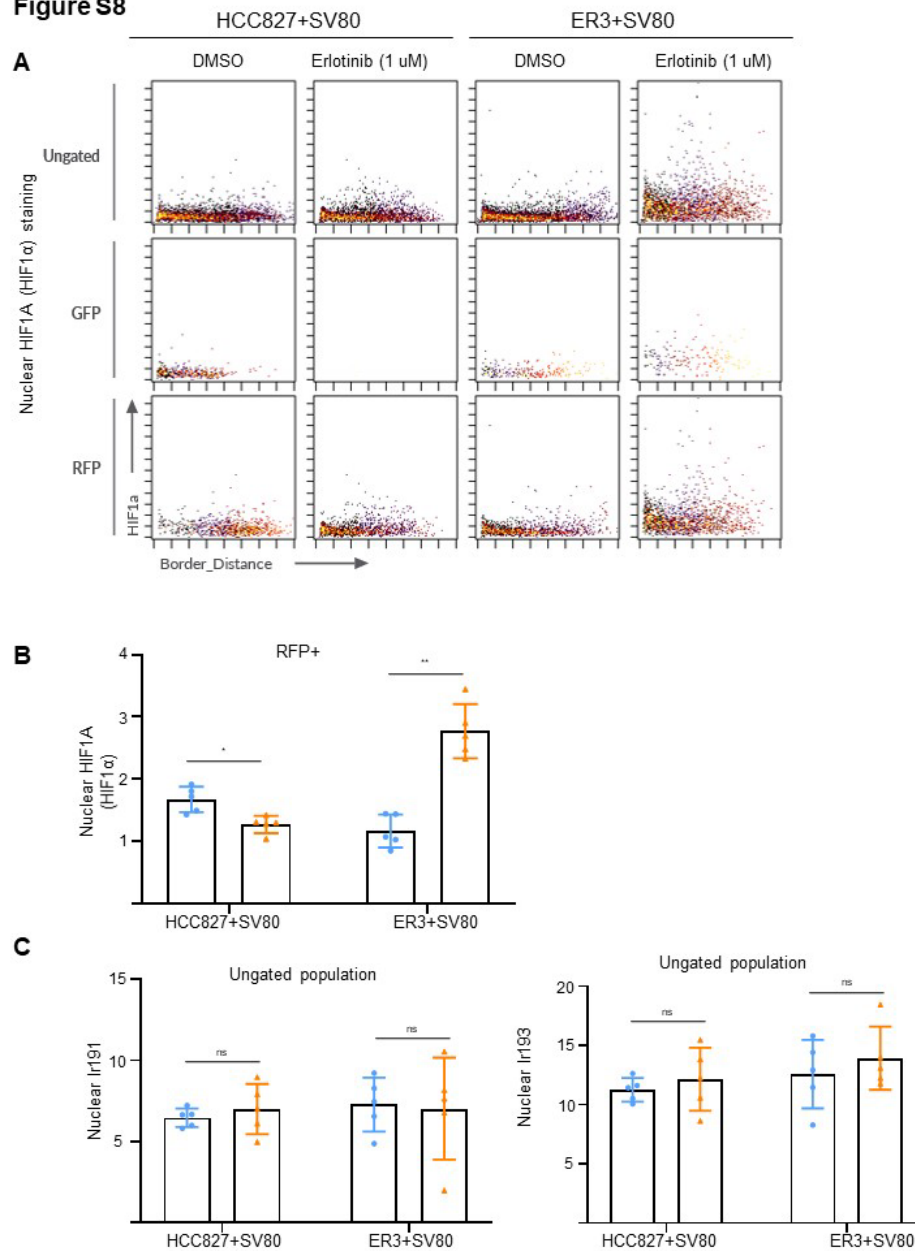

**Figure S8: Scatter blots and channel expression of selected markers**

- (A) Scatter plots displaying nuclear expression (mean channel intensity within the nuclei mask) of HIF1A (HIF1 $\alpha$ ) plotted against distance to border in the ungated, GFP+ and RFP+ populations.
- (B) Bar chart displaying quantified nuclear HIF1A (HIF1 $\alpha$ ) expression in the RFP+ population. Statistical significance in channel expression were calculated in cytobank using the Mann-Whitney U-test.
- (C) Bar charts displaying the nuclear Ir191 (left) and Ir193 (right) expression in the ungated populations of erlotinib and DMSO treated samples. No statistical significance was found by the Mann-Whitney U-test using cytobank to calculate the statistics.

Figure S9

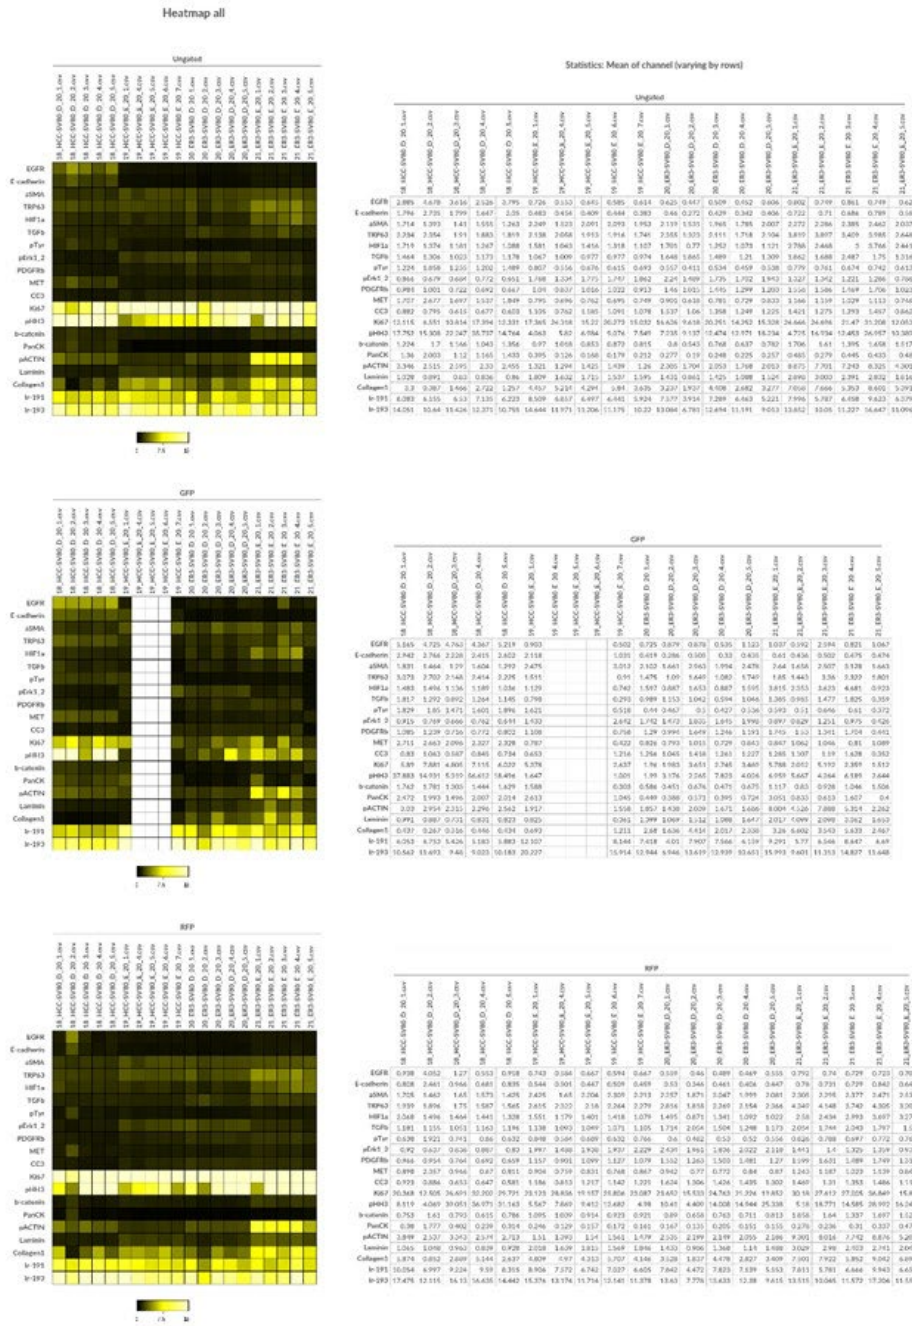

Figure S9: Heatmaps of marker expression of treated samples

Median fluorescence intensity values and heatmap visualization for the ungated, GFP+ and RFP+ populations of the vehicle (DMSO, D) and erlotinib (E) treated samples.

**Figure S10**

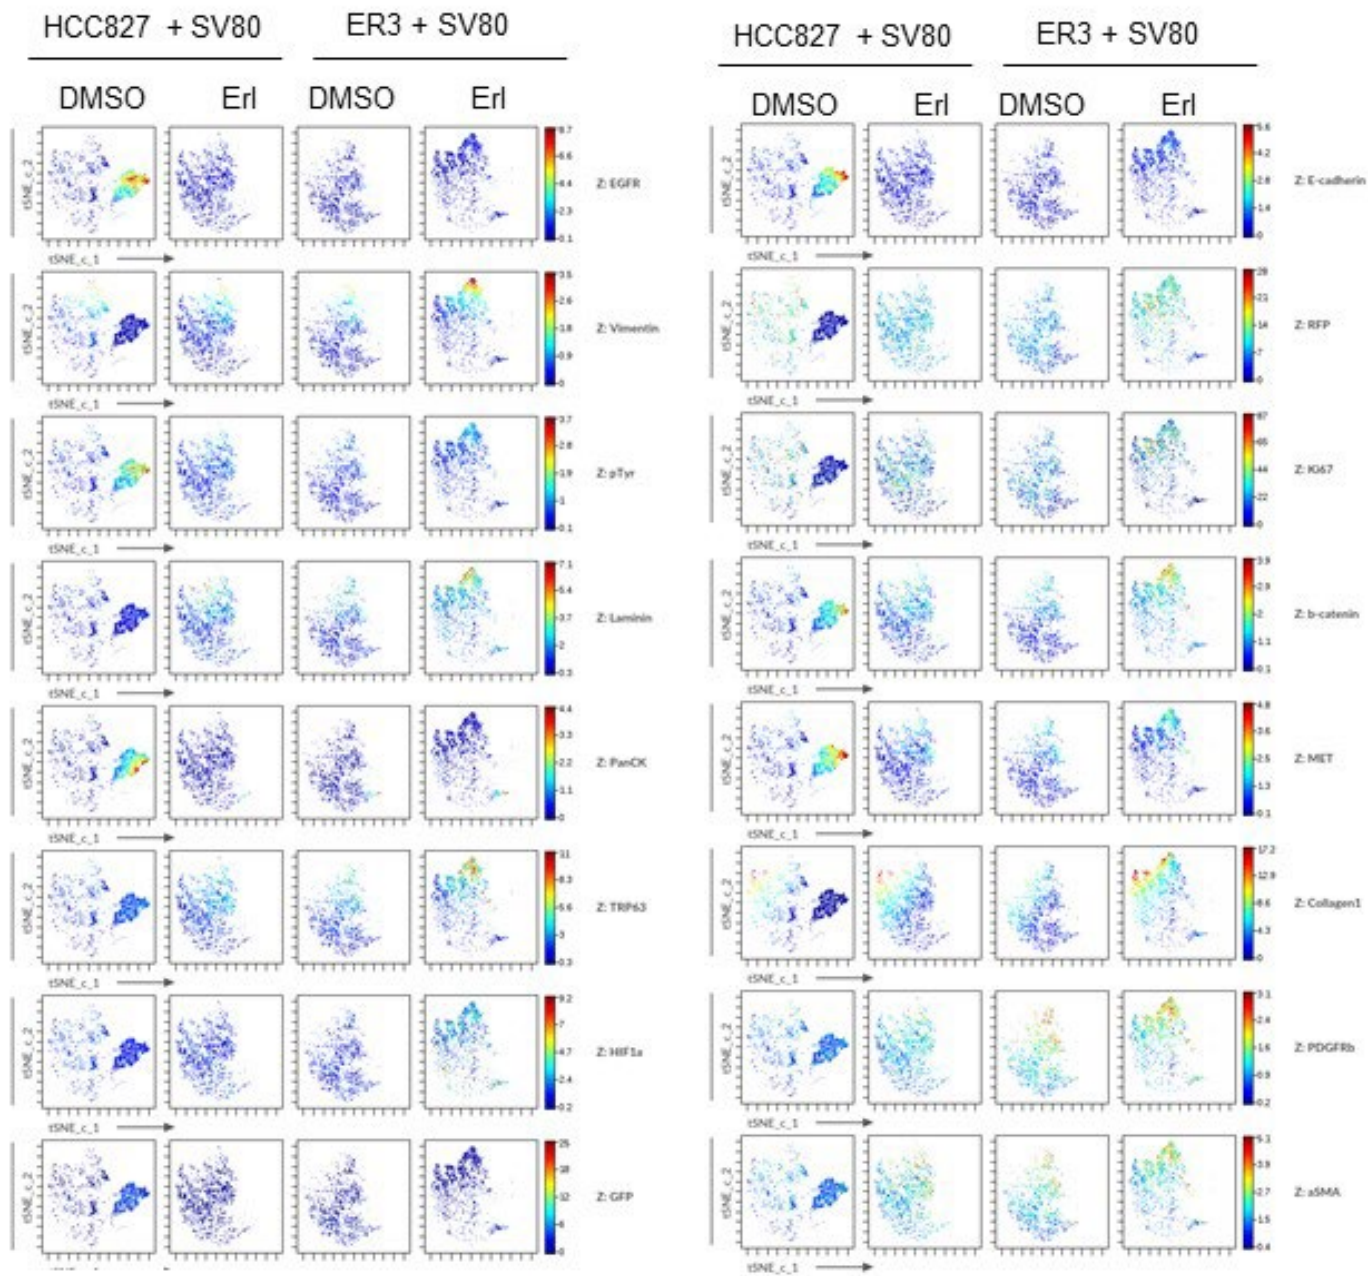

**Figure S10: ViSNE marker expression of treated samples**

Marker expression displayed on the viSNE plots for erlotinib and vehicle control (DMSO) treated samples.

## **2 Supplementary Videos**

### **Video S1:**

IncuCyte formation assay of ER3-GFP spheroids.

### **Video S2:**

IncuCyte formation assay of SV80-dsRed spheroids.

### **Video S3:**

IncuCyte formation assay of ER3-GFP + SV80-dsRed heterotypic co-culture spheroids.

### **Video S4:**

3D reconstruction in IMARIS of ER3-GFP + SV80-dsRed heterotypic co-culture spheroids imaged by Zeiss confocal microscopy and counterstained with Hoechst nuclear dye.
